# Supplementary material for: The hydration and unusual hydrogen bonding in the crystal structure of an RNA duplex containing alternating CG base pairs
Source: Royal Society of Chemistry journal article supplement (doi:10.1039/b9nj00601j), 2010-01-01
Supplement: b9nj00601j.pdf [file b9nj00601j.pdf]

## Supplementary Material for

### The hydration and unusual hydrogen bonding in the crystal structure of an RNA duplex containing alternating CG base pairs

Dorota A. Adamiak <sup>a</sup>, Jan Milecki <sup>b</sup>, Ryszard. W. Adamiak <sup>a</sup> and Wojciech Rypniewski <sup>\*a</sup>

<sup>a</sup> Institute of Bioorganic Chemistry, Polish Academy of Sciences, Noskowskiego 12/14, 61-704 Poznań, Poland, <sup>b</sup> Faculty of Chemistry, Adam Mickiewicz University, Poznań, Poland

**Supplementary Table 1.** Sugar, backbone and glycosidic torsion angles<sup>§</sup> calculated for the [CGCG(5-FC)G]<sub>2</sub> structures. Each column contains data for strands A, B and K, L from the triclinic form, strands A and B from the rhombohedral form, their average value and standard deviation (*italics*) and the average value and standard deviation for the previously reported 2'-O-Me(CGCGCG)<sub>2</sub> structures (PDB id 310d and 1i7j).<sup>6a,b</sup>

| Residue | $\alpha$          | $\beta$          | $\gamma$          | $\delta$         | $\epsilon$        | $\zeta$           | $\chi$            | $\Phi$            | P               | pucker           |                 |
|---------|-------------------|------------------|-------------------|------------------|-------------------|-------------------|-------------------|-------------------|-----------------|------------------|-----------------|
| C1      |                   |                  | 64.0              | 87.5             | -153.5            | -72.1             | -173.2            | 37.9              | 2.9             | C3'-endo         |                 |
|         |                   |                  | 59.7              | 79.8             | -152.7            | -74.5             | -169.0            | 42.5              | 9.2             | C3'-endo         |                 |
|         |                   |                  |                   | 78.7             | -146.5            | -75.3             | -162.2            | 46.1              | 9.1             | C3'-endo         |                 |
|         |                   |                  | 53.8              | 75.2             | -149.3            | -74.4             | -160.6            | 44.0              | 12.7            | C3'-endo         |                 |
|         |                   |                  | 89.9              | 86.3             | -135.3            | -92.5             | -176.6            | 37.8              | 12.1            | C3'-endo         |                 |
|         |                   |                  | 55.3              | 75.5             | -154.3            | -75.5             | -160.3            | 42.5              | 10.7            | C3'-endo         |                 |
|         |                   |                  | <i>64.5±14.7</i>  | <i>80.5±5.3</i>  | <i>-148.6±7.1</i> | <i>-77.4±7.5</i>  | <i>-167.0±7.0</i> | <i>41.8±3.3</i>   | <i>5.4±9.2</i>  |                  |                 |
|         |                   |                  | <i>42.5±7.8</i>   | <i>87.0±8.9</i>  | <i>-147.8±7.9</i> | <i>-76.9±3.7</i>  | <i>-162.0±3.7</i> | <i>47.1±4.7</i>   | <i>14.6±7.9</i> | <i>C3'-endo</i>  |                 |
| G2      | -77.9             | -179.7           | 57.1              | 78.8             | -154.7            | -76.7             | -159.8            | 45.7              | 8.5             | C3'-endo         |                 |
|         | -65.7             | 179.6            | 50.7              | 76.3             | -144.9            | -68.2             | -165.0            | 44.8              | 14.3            | C3'-endo         |                 |
|         | -63.2             | 166.4            | 54.5              | 80.2             | -154.5            | -70.7             | -168.7            | 44.6              | 12.3            | C3'-endo         |                 |
|         | -65.5             | 175.6            | 50.2              | 79.8             | -141.4            | -72.2             | -158.5            | 44.1              | 14.0            | C3'-endo         |                 |
|         | -65.4             | -172.5           | 47.8              | 82.4             | -145.0            | -71.2             | -156.5            | 44.5              | 359.2           | C2'-exo          |                 |
|         | -66.9             | 177.2            | 56.3              | 81.2             | -144.6            | -73.4             | -161.8            | 43.4              | 9.3             | C3'-endo         |                 |
|         | <i>-67.4±5.3</i>  | <i>177.8±6.9</i> | <i>52.8±3.7</i>   | <i>79.8±2.1</i>  | <i>-147.5±5.6</i> | <i>72.1±2.9</i>   | <i>-161.7±4.5</i> | <i>44.5±0.8</i>   | <i>9.6±5.6</i>  |                  |                 |
|         |                   | <i>-67.2±3.2</i> | <i>177.7±1.3</i>  | <i>49.2±3.7</i>  | <i>83.6±7.6</i>   | <i>-144.8±8.7</i> | <i>-73.4±4.1</i>  | <i>-165.3±1.4</i> | <i>40.1±8.1</i> | <i>13.5±15.8</i> | <i>C3'-endo</i> |
| C3      | -62.8             | 169.5            | 52.8              | 79.3             | -147.6            | -61.6             | -155.9            | 45.8              | 9.8             | C3'-endo         |                 |
|         | -64.5             | 168.0            | 54.5              | 79.7             | -158.9            | -76.3             | -163.6            | 44.1              | 8.8             | C3'-endo         |                 |
|         | -60.9             | 174.4            | 47.0              | 81.8             | -161.7            | -74.0             | -162.3            | 46.1              | 9.1             | C3'-endo         |                 |
|         | -65.1             | 167.9            | 59.8              | 77.8             | -160.6            | -74.6             | -157.0            | 44.1              | 15.5            | C3'-endo         |                 |
|         | -61.2             | 166.5            | 55.2              | 55.2             | -154.3            | -66.7             | -158.9            | 50.1              | 19.2            | C3'-endo         |                 |
|         | -59.8             | 172.7            | 47.2              | 79.4             | -157.9            | -69.3             | -158.0            | 48.3              | 11.6            | C3'-endo         |                 |
|         | <i>-62.4±2.1</i>  | <i>169.8±3.1</i> | <i>52.8±5.0</i>   | <i>75.5±10.0</i> | <i>-156.8±5.2</i> | <i>-70.4±5.6</i>  | <i>-159.3±3.0</i> | <i>46.4±2.4</i>   | <i>12.3±4.2</i> |                  |                 |
|         |                   | <i>-74.7±9.0</i> | <i>172.1±1.3</i>  | <i>52.2±7.7</i>  | <i>74.0±4.9</i>   | <i>-146.6±4.9</i> | <i>-69.2±1.5</i>  | <i>-161.7±1.8</i> | <i>40.9±7.2</i> | <i>18.3±7.7</i>  | <i>C3'-endo</i> |
| G4      | -88.5             | 159.1            | 90.0              | 71.9             | -150.6            | -75.6             | -155.9            | 47.8              | 17.3            | C3'-endo         |                 |
|         | -67.3             | 173.1            | 55.4              | 78.8             | -143.0            | -73.7             | -160.9            | 44.9              | 13.5            | C3'-endo         |                 |
|         | -59.3             | 172.1            | 54.7              | 78.4             | -155.4            | -78.0             | -161.8            | 44.1              | 12.6            | C3'-endo         |                 |
|         | 161.5             | -171.2           | 176.8             | 85.2             | -152.0            | -71.4             | -178.5            | 43.3              | 10.4            | C3'-endo         |                 |
|         | -73.2             | 168.6            | 63.0              | 78.8             | -154.8            | -70.6             | -161.4            | 42.1              | 7.3             | C3'-endo         |                 |
|         | -68.4             | 176.4            | 54.2              | 77.6             | -138.4            | -78.7             | -164.3            | 47.5              | 9.1             | C3'-endo         |                 |
|         | <i>-56.4±37.9</i> | <i>173.0±9.7</i> | <i>82.4±48.2</i>  | <i>78.5±4.2</i>  | <i>-149.0±6.8</i> | <i>-74.7±3.4</i>  | <i>-163.8±7.7</i> | <i>45.0±2.3</i>   | <i>11.7±3.6</i> |                  |                 |
|         |                   | <i>-70.1±2.9</i> | <i>178.1±1.73</i> | <i>51.4±3.7</i>  | <i>77.5±2.1</i>   | <i>-145.9±0.7</i> | <i>-71.8±2.3</i>  | <i>-162.3±1.2</i> | <i>45.4±2.7</i> | <i>13.6±9.1</i>  | <i>C3'-endo</i> |
| 5-FC5   | -70.0             | 173.1            | 49.8              | 80.3             | -151.2            | -64.8             | -160.7            | 46.5              | 9.9             | C3'-endo         |                 |
|         | -61.8             | 171.1            | 47.6              | 75.1             | -154.6            | -69.7             | -160.5            | 44.4              | 13.0            | C3'-endo         |                 |
|         | -67.0             | 172.3            | 50.4              | 76.4             | -155.4            | -74.8             | -159.7            | 46.0              | 11.8            | C3'-endo         |                 |
|         | -65.8             | 177.3            | 54.8              | 81.2             | -156.3            | -74.3             | -165.0            | 45.3              | 19.0            | C3'-endo         |                 |
|         | -65.6             | 171.3            | 53.8              | 82.3             | -148.1            | -69.5             | -160.3            | 47.2              | 10.3            | C3'-endo         |                 |
|         | -51.9             | 169.2            | 37.6              | 85.0             | -157.9            | -71.4             | -160.3            | 50.7              | 8.4             | C3'-endo         |                 |
|         | <i>-63.7±6.3</i>  | <i>172.4±2.7</i> | <i>49.0±6.2</i>   | <i>80.1±3.7</i>  | <i>-153.9±3.6</i> | <i>-70.8±3.7</i>  | <i>-161.0±1.9</i> | <i>46.7±2.2</i>   | <i>12.1±3.7</i> |                  |                 |
|         |                   | <i>-66.6±1.1</i> | <i>171.9±1.0</i>  | <i>51.6±2.0</i>  | <i>74.3±3.5</i>   | <i>-151.4±3.3</i> | <i>-66.5±2.1</i>  | <i>-165.7±2.3</i> | <i>41.9±2.5</i> | <i>11.1±3.4</i>  | <i>C3'-endo</i> |
| G6      | -69.9             | 179.6            | 57.1              | 77.9             |                   |                   | -160.7            | 39.3              | 18.0            | C3'-endo         |                 |
|         | -60.9             | 165.7            | 62.9              | 89.1             |                   |                   | -168.2            | 35.4              | 2.5             | C3'-endo         |                 |
|         | -60.7             | 165.2            | 61.5              | 82.2             |                   |                   | -162.8            | 39.9              | 19.1            | C3'-endo         |                 |
|         | -64.5             | -179.6           | 50.4              | 83.2             |                   |                   | -153.2            | 42.7              | 12.9            | C3'-endo         |                 |
|         | -65.9             | 175.8            | 53.4              | 82.2             |                   |                   | -160.5            | 41.0              | 22.6            | C3'-endo         |                 |
|         | -58.5             | 167.3            | 58.9              | 66.2             |                   |                   | -164.2            | 47.5              | 30.3            | C3'-endo         |                 |
|         | <i>-63.4±4.2</i>  | <i>172.3±7.1</i> | <i>57.4±4.8</i>   | <i>80.1±7.7</i>  |                   |                   | <i>-161.6±5.0</i> | <i>41.0±4.0</i>   | <i>17.6±9.4</i> |                  |                 |
|         |                   | <i>-65.9±2.5</i> | <i>179.5±3.7</i>  | <i>56.9±7.5</i>  | <i>80.6±10.0</i>  |                   | <i>-158.3±1.7</i> | <i>40.0±8.5</i>   | <i>16.4±3.5</i> | <i>C3'-endo</i>  |                 |
| A-RNA   | -68               | 178              | 54                | 82               | -153              | -71               | -158              |                   |                 | C3'-endo         |                 |

<sup>§</sup> P <sup>α</sup> O5' <sup>β</sup> C5' <sup>γ</sup> C4' <sup>δ</sup> C3' <sup>ε</sup> O3' <sup>ζ</sup> P

**Supplementary Table 2.** Helical parameters for [CGCG(5-FC)G]<sub>2</sub> structures, for duplexes A/B and K/L from the triclinic form, duplex A/B from the rhombohedral form and the values (*italics*) for the previously reported 2'-O-Me(CGCGCG)<sub>2</sub> structures (PDB ids 310d and 1i7j). <sup>6a,b</sup> The parameters were calculated with the program 3DNA. <sup>26</sup>

Local base-pair parameters

| bp            | Shear                                                                          | Stretch                                                                         | Stagger                                                                      | Buckle (°)                                                                    | Propeller (°)                                                                         | Opening (°)                                                                    |
|---------------|--------------------------------------------------------------------------------|---------------------------------------------------------------------------------|------------------------------------------------------------------------------|-------------------------------------------------------------------------------|---------------------------------------------------------------------------------------|--------------------------------------------------------------------------------|
| 1 C-G         | 0.08<br>0.24<br>0.01<br><i>0.21</i><br><i>0.03</i>                             | -0.22<br>-0.16<br>-0.22<br><i>0.08</i><br><i>-0.07</i>                          | 0.06<br>-0.01<br>0.02<br><i>-0.11</i><br><i>-0.06</i>                        | -3.42<br>5.91<br>9.01<br><i>7.21</i><br><i>9.03</i>                           | -8.99<br>-8.08<br>-18.27<br><i>-14.14</i><br><i>-16.36</i>                            | 1.72<br>0.10<br>1.85<br><i>-0.79</i><br><i>-2.31</i>                           |
| 2 G-C         | -0.28<br>-0.11<br>-1.14<br><i>-0.13</i><br><i>-0.18</i>                        | -0.14<br>-0.15<br>-0.06<br><i>0.04</i><br><i>-0.14</i>                          | 0.11<br>0.19<br>0.25<br><i>0.03</i><br><i>0.27</i>                           | -4.04<br>1.79<br>-0.33<br><i>3.19</i><br><i>6.93</i>                          | -10.16<br>-13.01<br>-14.26<br><i>-12.47</i><br><i>-13.36</i>                          | 1.14<br>1.41<br>6.18<br><i>0.23</i><br><i>-0.44</i>                            |
| 3 C-G         | 0.17<br>0.26<br>0.18<br><i>0.18</i><br><i>0.19</i>                             | -0.14<br>-0.20<br>-0.19<br><i>0.02</i><br><i>-0.15</i>                          | 0.09<br>0.03<br>0.09<br><i>-0.09</i><br><i>-0.07</i>                         | -0.76<br>0.65<br>3.69<br><i>2.48</i><br><i>3.68</i>                           | -9.91<br>-10.75<br>-17.99<br><i>-14.10</i><br><i>-15.82</i>                           | -2.02<br>0.45<br>-1.65<br><i>-1.67</i><br><i>-1.23</i>                         |
| 4 G-C         | -0.28<br>-0.17<br>-0.08<br><i>-0.18</i><br><i>-0.15</i>                        | -0.14<br>-0.11<br>-0.14<br><i>0.03</i><br><i>-0.18</i>                          | 0.15<br>0.05<br>0.02<br><i>0.01</i><br><i>-0.04</i>                          | -0.30<br>-2.12<br>-3.83<br><i>-1.10</i><br><i>-3.04</i>                       | -10.33<br>-10.53<br>-13.58<br><i>-13.05</i><br><i>-15.39</i>                          | -1.20<br>0.10<br>-1.68<br><i>-1.70</i><br><i>-1.54</i>                         |
| 5 FC-G        | 0.22<br>0.16<br>0.21<br><i>0.28</i><br><i>0.15</i>                             | -0.22<br>-0.11<br>-0.26<br><i>0.05</i><br><i>-0.14</i>                          | 0.04<br>-0.02<br>0.15<br><i>0.03</i><br><i>0.12</i>                          | 0.99<br>2.87<br>-3.41<br><i>-3.51</i><br><i>-5.49</i>                         | -13.20<br>-14.72<br>-15.20<br><i>-12.62</i><br><i>-14.40</i>                          | -2.69<br>-0.38<br>-1.10<br><i>0.27</i><br><i>-1.41</i>                         |
| 6 G-C         | -0.05<br>-0.08<br>-0.09<br><i>0.06</i><br><i>-0.04</i>                         | -0.13<br>-0.15<br>-0.13<br><i>0.08</i><br><i>-0.12</i>                          | -0.06<br>0.08<br>0.02<br><i>-0.08</i><br><i>-0.01</i>                        | -3.03<br>-2.63<br>-9.76<br><i>-6.86</i><br><i>-8.04</i>                       | -7.49<br>-15.12<br>-14.00<br><i>-15.80</i><br><i>-17.14</i>                           | -1.14<br>-0.34<br>-1.98<br><i>-1.78</i><br><i>-3.63</i>                        |
| Ave., st.dev. | -0.02±0.22<br>0.05±0.19<br>-0.15±0.50<br><i>0.07±0.19</i><br><i>-0.00±0.16</i> | -0.16±0.04<br>-0.15±0.03<br>-0.17±0.07<br><i>0.05±0.03</i><br><i>-0.13±0.04</i> | 0.06±0.07<br>0.05±0.08<br>0.09±0.09<br><i>-0.03±0.06</i><br><i>0.03±0.14</i> | -1.76±2.02<br>1.08±3.20<br>-0.77±6.53<br><i>0.24±5.07</i><br><i>0.51±7.01</i> | -10.01±1.88<br>-12.03±2.73<br>-15.55±2.07<br><i>-13.70±1.25</i><br><i>-15.41±1.37</i> | -0.70±1.76<br>0.22±0.66<br>0.27±3.22<br><i>-0.91±0.97</i><br><i>-1.76±1.09</i> |

Local base-pair step parameters

| Step          | Shift (Å)                                                                        | Slide (Å)                                                                        | Rise (Å)                                                                    | Tilt                                                                           | Roll                                                                          | Twist                                                                            |
|---------------|----------------------------------------------------------------------------------|----------------------------------------------------------------------------------|-----------------------------------------------------------------------------|--------------------------------------------------------------------------------|-------------------------------------------------------------------------------|----------------------------------------------------------------------------------|
| 1 CG/(5-FC)G  | -0.63<br>0.45<br>-0.68<br><i>-0.54</i><br><i>-0.37</i>                           | -1.88<br>-1.64<br>-1.90<br><i>-1.93</i><br><i>-1.82</i>                          | 3.16<br>3.28<br>3.36<br><i>3.39</i><br><i>3.13</i>                          | -0.12<br>-2.09<br>-4.44<br><i>-4.33</i><br><i>-7.43</i>                        | 7.66<br>9.30<br>9.48<br><i>15.45</i><br><i>15.00</i>                          | 29.71<br>30.29<br>33.56<br><i>30.53</i><br><i>32.30</i>                          |
| 2 G(5-FC)/GC  | -0.46<br>0.25<br>-0.20<br><i>-0.41</i><br><i>-0.58</i>                           | -1.30<br>-1.96<br>-1.30<br><i>-1.41</i><br><i>-1.42</i>                          | 3.24<br>3.27<br>3.15<br><i>3.44</i><br><i>3.29</i>                          | 0.47<br>1.92<br>0.89<br><i>-0.85</i><br><i>0.45</i>                            | 6.97<br>0.22<br>6.47<br><i>10.27</i><br><i>10.37</i>                          | 33.21<br>34.98<br>33.76<br><i>33.55</i><br><i>34.92</i>                          |
| 3 CG/CG       | 0.97<br>-0.63<br>0.15<br><i>-0.04</i><br><i>-0.02</i>                            | -1.80<br>-2.25<br>-1.59<br><i>-1.84</i><br><i>-1.67</i>                          | 3.13<br>3.24<br>3.31<br><i>3.34</i><br><i>3.23</i>                          | 0.86<br>-0.80<br>1.55<br><i>-1.01</i><br><i>-0.41</i>                          | 11.41<br>9.09<br>13.87<br><i>18.06</i><br><i>19.90</i>                        | 27.28<br>23.60<br>30.80<br><i>29.29</i><br><i>30.77</i>                          |
| 4 GC/G(5-FC)  | -0.61<br>-0.75<br>-0.03<br><i>0.43</i><br><i>0.54</i>                            | -1.42<br>-1.34<br>-1.37<br><i>-1.40</i><br><i>-1.41</i>                          | 3.23<br>3.20<br>3.22<br><i>3.48</i><br><i>3.28</i>                          | -0.68<br>-2.04<br>0.52<br><i>1.56</i><br><i>1.11</i>                           | 4.66<br>5.30<br>3.95<br><i>10.36</i><br><i>10.49</i>                          | 35.54<br>32.20<br>35.39<br><i>34.67</i><br><i>34.37</i>                          |
| 5 (5-FC)G/CG  | 0.65<br>0.37<br>0.49<br><i>0.42</i><br><i>0.39</i>                               | -1.91<br>-1.54<br>-1.63<br><i>-1.96</i><br><i>-1.82</i>                          | 3.27<br>3.24<br>3.27<br><i>3.34</i><br><i>3.16</i>                          | 1.80<br>0.15<br>4.44<br><i>4.05</i><br><i>5.84</i>                             | 9.52<br>16.75<br>12.04<br><i>16.27</i><br><i>15.42</i>                        | 31.74<br>30.75<br>32.15<br><i>31.80</i><br><i>32.31</i>                          |
| Ave., st.dev. | -0.02±0.77<br>-0.06±0.58<br>-0.06±0.43<br><i>-0.03±0.45</i><br><i>-0.01±0.48</i> | -1.66±0.28<br>-1.75±0.36<br>-1.56±0.24<br><i>-1.71±0.28</i><br><i>-1.63±0.20</i> | 3.21±0.06<br>3.25±0.03<br>3.26±0.08<br><i>3.40±0.06</i><br><i>3.22±0.07</i> | 0.47±0.95<br>-0.57±1.68<br>0.59±3.21<br><i>-0.12±3.13</i><br><i>-0.09±4.76</i> | 8.04±2.56<br>8.13±6.07<br>9.16±4.03<br><i>14.08±3.57</i><br><i>14.24±3.97</i> | 31.49±3.17<br>30.36±4.20<br>33.13±1.74<br><i>31.97±2.19</i><br><i>32.93±1.69</i> |

Local base-pair helical parameters

| Step           | X-disp                                                             | Y-disp                                                        | h-Rise                                                        | Incl.                                                               | Tip                                                             | h-Twist                                                            |
|----------------|--------------------------------------------------------------------|---------------------------------------------------------------|---------------------------------------------------------------|---------------------------------------------------------------------|-----------------------------------------------------------------|--------------------------------------------------------------------|
| 1 CG/(5-FC)G   | -4.91                                                              | 1.18                                                          | 2.61                                                          | 14.63                                                               | 0.22                                                            | 30.66                                                              |
|                | -4.59                                                              | 1.18                                                          | 2.63                                                          | 17.27                                                               | 3.88                                                            | 31.72                                                              |
|                | -4.51                                                              | 0.49                                                          | 2.80                                                          | 15.94                                                               | 7.47                                                            | 35.11                                                              |
|                | -5.46                                                              | 0.30                                                          | 2.24                                                          | 27.11                                                               | 7.61                                                            | 34.40                                                              |
|                | -4.72                                                              | -0.29                                                         | 2.14                                                          | 24.99                                                               | 12.37                                                           | 36.28                                                              |
| 2 G(5-FC)/GC   | -3.29                                                              | 0.87                                                          | 2.91                                                          | 12.02                                                               | -0.81                                                           | 33.92                                                              |
|                | -3.28                                                              | -0.13                                                         | 3.27                                                          | 0.36                                                                | -3.19                                                           | 35.03                                                              |
|                | -3.13                                                              | 0.47                                                          | 2.85                                                          | 11.01                                                               | -1.51                                                           | 34.37                                                              |
|                | -3.88                                                              | 0.55                                                          | 2.90                                                          | 17.29                                                               | 1.43                                                            | 35.06                                                              |
|                | -3.64                                                              | 0.99                                                          | 2.77                                                          | 16.83                                                               | -0.73                                                           | 36.38                                                              |
| 3 CG/CG        | -5.61                                                              | -1.74                                                         | 2.24                                                          | 22.95                                                               | -1.73                                                           | 29.54                                                              |
|                | -7.44                                                              | 1.24                                                          | 2.25                                                          | 21.23                                                               | 1.87                                                            | 25.28                                                              |
|                | -4.80                                                              | -0.03                                                         | 2.40                                                          | 24.60                                                               | -2.74                                                           | 33.75                                                              |
|                | -5.59                                                              | -0.06                                                         | 1.92                                                          | 32.15                                                               | 1.80                                                            | 34.32                                                              |
|                | -5.00                                                              | -0.02                                                         | 1.85                                                          | 33.47                                                               | 0.69                                                            | 36.51                                                              |
| 4 GC/G(5-FC)   | -2.96                                                              | 0.90                                                          | 3.04                                                          | 7.59                                                                | 1.10                                                            | 35.84                                                              |
|                | -3.25                                                              | 1.00                                                          | 2.99                                                          | 9.46                                                                | 3.65                                                            | 32.68                                                              |
|                | -2.79                                                              | 0.12                                                          | 3.06                                                          | 6.47                                                                | -0.85                                                           | 35.60                                                              |
|                | -3.72                                                              | -0.47                                                         | 2.97                                                          | 16.91                                                               | -2.55                                                           | 36.18                                                              |
|                | -3.71                                                              | -0.73                                                         | 2.76                                                          | 17.26                                                               | -1.82                                                           | 35.91                                                              |
| 5 (5-FC)G/CG   | -4.83                                                              | -0.86                                                         | 2.63                                                          | 16.92                                                               | -3.20                                                           | 33.15                                                              |
|                | -4.81                                                              | -0.60                                                         | 2.15                                                          | 29.05                                                               | -0.26                                                           | 34.92                                                              |
|                | -4.47                                                              | -0.18                                                         | 2.55                                                          | 20.73                                                               | -7.64                                                           | 34.56                                                              |
|                | -5.28                                                              | -0.16                                                         | 2.16                                                          | 27.44                                                               | -6.83                                                           | 35.85                                                              |
|                | -4.80                                                              | 0.09                                                          | 2.14                                                          | 25.72                                                               | -9.74                                                           | 36.17                                                              |
| Ave., st. dev. | -4.32±1.14<br>-4.67±1.71<br>-3.94±0.91<br>-4.79±0.91<br>-4.37±0.65 | 0.07±1.29<br>0.06±1.03<br>0.17±0.30<br>0.03±0.40<br>0.01±0.63 | 2.69±0.31<br>2.66±0.48<br>2.73±0.26<br>2.44±0.47<br>2.33±0.41 | 14.82±5.72<br>15.47±11.01<br>15.75±7.28<br>24.18±6.76<br>23.65±6.89 | -0.88±1.68<br>1.19±2.96<br>-1.05±5.46<br>0.29±5.38<br>0.16±7.94 | 32.62±2.53<br>31.93±3.98<br>34.68±0.71<br>35.16±0.84<br>36.25±0.23 |
